# Supplementary material for: Diverse and atypical manifestations of Q fever in a metropolitan city hospital: Emerging role of next-generation sequencing for laboratory diagnosis of Coxiella burnetii
Source: PubMed Central journal article supplement (PMC9060374; doi:10.1371/journal.pntd.0010364), 2022-04-20
Supplement: pntd.0010364.s004.pdf [file pntd.0010364.s004.pdf]

# PLOS Neglected Tropical Diseases

## Diverse and atypical manifestations of Q fever in a metropolitan city hospital: emerging role of next-generation sequencing for laboratory diagnosis of *Coxiella burnetii*, a potential biological warfare agent

--Manuscript Draft--

|                                                                                                                                                                                                                                                                                                                                                                                                                                                                                               |                                                                                                                                                                                                                                                                                                                                                                                                                                                                                                                                                                                                                                                                                                                                                                                                                                                                                                                                                                                                                                                                                                                                                                                                                                                                                                                                                                                                                                                                                                                                                                                                                                                                                                                                                                                                                                                                                                                                                                                                             |
|-----------------------------------------------------------------------------------------------------------------------------------------------------------------------------------------------------------------------------------------------------------------------------------------------------------------------------------------------------------------------------------------------------------------------------------------------------------------------------------------------|-------------------------------------------------------------------------------------------------------------------------------------------------------------------------------------------------------------------------------------------------------------------------------------------------------------------------------------------------------------------------------------------------------------------------------------------------------------------------------------------------------------------------------------------------------------------------------------------------------------------------------------------------------------------------------------------------------------------------------------------------------------------------------------------------------------------------------------------------------------------------------------------------------------------------------------------------------------------------------------------------------------------------------------------------------------------------------------------------------------------------------------------------------------------------------------------------------------------------------------------------------------------------------------------------------------------------------------------------------------------------------------------------------------------------------------------------------------------------------------------------------------------------------------------------------------------------------------------------------------------------------------------------------------------------------------------------------------------------------------------------------------------------------------------------------------------------------------------------------------------------------------------------------------------------------------------------------------------------------------------------------------|
| <b>Manuscript Number:</b>                                                                                                                                                                                                                                                                                                                                                                                                                                                                     | PNTD-D-22-00084                                                                                                                                                                                                                                                                                                                                                                                                                                                                                                                                                                                                                                                                                                                                                                                                                                                                                                                                                                                                                                                                                                                                                                                                                                                                                                                                                                                                                                                                                                                                                                                                                                                                                                                                                                                                                                                                                                                                                                                             |
| <b>Full Title:</b>                                                                                                                                                                                                                                                                                                                                                                                                                                                                            | Diverse and atypical manifestations of Q fever in a metropolitan city hospital: emerging role of next-generation sequencing for laboratory diagnosis of <i>Coxiella burnetii</i> , a potential biological warfare agent                                                                                                                                                                                                                                                                                                                                                                                                                                                                                                                                                                                                                                                                                                                                                                                                                                                                                                                                                                                                                                                                                                                                                                                                                                                                                                                                                                                                                                                                                                                                                                                                                                                                                                                                                                                     |
| <b>Short Title:</b>                                                                                                                                                                                                                                                                                                                                                                                                                                                                           | Q fever in metropolitan city hospital                                                                                                                                                                                                                                                                                                                                                                                                                                                                                                                                                                                                                                                                                                                                                                                                                                                                                                                                                                                                                                                                                                                                                                                                                                                                                                                                                                                                                                                                                                                                                                                                                                                                                                                                                                                                                                                                                                                                                                       |
| <b>Article Type:</b>                                                                                                                                                                                                                                                                                                                                                                                                                                                                          | Research Article                                                                                                                                                                                                                                                                                                                                                                                                                                                                                                                                                                                                                                                                                                                                                                                                                                                                                                                                                                                                                                                                                                                                                                                                                                                                                                                                                                                                                                                                                                                                                                                                                                                                                                                                                                                                                                                                                                                                                                                            |
| <b>Keywords:</b>                                                                                                                                                                                                                                                                                                                                                                                                                                                                              | Q fever; <i>Coxiella burnetii</i> ; glomerulonephritis; peritonitis; endocarditis; brucellosis; next-generation sequencing                                                                                                                                                                                                                                                                                                                                                                                                                                                                                                                                                                                                                                                                                                                                                                                                                                                                                                                                                                                                                                                                                                                                                                                                                                                                                                                                                                                                                                                                                                                                                                                                                                                                                                                                                                                                                                                                                  |
| <b>Abstract:</b>                                                                                                                                                                                                                                                                                                                                                                                                                                                                              | <p>Although Q fever has been widely reported in the rural areas of China, there is a paucity of data on the epidemiology and clinical characteristics of this disease in large metropolitan cities. In this study, we profile the epidemiology and clinical manifestations of Q fever from a tertiary hospital in Shenzhen, a Southern Chinese metropolitan city with a large immigrant population from other parts of China. A total of 14 patients were confirmed to have Q fever during a nine-year-and-six-month period, five of whom were retrospectively diagnosed during case review or incidentally picked up because of another research project on unexplained fever without localizing features. Some patients had the typical occupation and/or exposure history, while a few other patients have rare manifestations of Q fever, including one with heart failure and diffuse intracapillary proliferative glomerulonephritis, a patient presenting with a spontaneous bacterial peritonitis-like syndrome, and another one with concomitant Q fever and brucellosis. Using a combination of clinical manifestation, inflammatory marker levels, echocardiographic findings and serological or molecular test results, nine, three and two patients were diagnosed to have acute, chronic and convalescent Q fever, respectively. Seven, five and two patients were diagnosed to have Q fever by serological test, nested real-time PCR and next-generation sequencing respectively. Due to its diverse and atypical manifestations not recognized by clinicians, the disease was often self-limiting or has responded to empirical doxycycline prescribed for other purposes, and a lack of laboratory support in some hospitals, the incidence of Q fever is likely to be underestimated. Next-generation sequencing is becoming an important diagnostic modality for culture-negative infections, particularly those that the physicians fail to recognize clinically, such as Q fever.</p> |
| <b>Additional Information:</b>                                                                                                                                                                                                                                                                                                                                                                                                                                                                |                                                                                                                                                                                                                                                                                                                                                                                                                                                                                                                                                                                                                                                                                                                                                                                                                                                                                                                                                                                                                                                                                                                                                                                                                                                                                                                                                                                                                                                                                                                                                                                                                                                                                                                                                                                                                                                                                                                                                                                                             |
| <b>Question</b>                                                                                                                                                                                                                                                                                                                                                                                                                                                                               | <b>Response</b>                                                                                                                                                                                                                                                                                                                                                                                                                                                                                                                                                                                                                                                                                                                                                                                                                                                                                                                                                                                                                                                                                                                                                                                                                                                                                                                                                                                                                                                                                                                                                                                                                                                                                                                                                                                                                                                                                                                                                                                             |
| <b>Financial Disclosure</b><br><br>Enter a financial disclosure statement that describes the sources of funding for the work included in this submission. Review the <a href="#">submission guidelines</a> for detailed requirements. View published research articles from <a href="#">PLOS NTDs</a> for specific examples.<br><br>This statement is required for submission and <b>will appear in the published article</b> if the submission is accepted. Please make sure it is accurate. | <p>This study was partly supported by Sanming Project of Medicine in Shenzhen, China (SZSM201911014, <a href="http://wjw.sz.gov.cn/ztlz/smgc/">http://wjw.sz.gov.cn/ztlz/smgc/</a>), and FX received the award for this study. The funders had no role in study design, data collection and analysis, decision to publish, or preparation of the manuscript.</p>                                                                                                                                                                                                                                                                                                                                                                                                                                                                                                                                                                                                                                                                                                                                                                                                                                                                                                                                                                                                                                                                                                                                                                                                                                                                                                                                                                                                                                                                                                                                                                                                                                            |

### Unfunded studies

Enter: *The author(s) received no specific funding for this work.*

### Funded studies

Enter a statement with the following details:

- Initials of the authors who received each award
- Grant numbers awarded to each author
- The full name of each funder
- URL of each funder website
- Did the sponsors or funders play any role in the study design, data collection and analysis, decision to publish, or preparation of the manuscript?
- **NO** - Include this sentence at the end of your statement: *The funders had no role in study design, data collection and analysis, decision to publish, or preparation of the manuscript.*
- **YES** - Specify the role(s) played.

\* typeset

### Competing Interests

Use the instructions below to enter a competing interest statement for this submission. On behalf of all authors, disclose any [competing interests](#) that could be perceived to bias this work—acknowledging all financial support and any other relevant financial or non-financial competing interests.

This statement **will appear in the published article** if the submission is accepted. Please make sure it is accurate. View published research articles from [PLOS NTDs](#) for specific examples.

The authors have declared that no competing interests exist.

**NO authors have competing interests**

Enter: *The authors have declared that no competing interests exist.*

**Authors with competing interests**

Enter competing interest details beginning with this statement:

*I have read the journal's policy and the authors of this manuscript have the following competing interests: [insert competing interests here]*

\* typeset

This statement is **required** for submission and **will appear in the published article** if the submission is accepted. Please make sure it is accurate and that any funding sources listed in your Funding Information later in the submission form are also declared in your Financial Disclosure statement.

**Data Availability**

Authors are required to make all data underlying the findings described fully available, without restriction, and from the time of publication. PLOS allows rare exceptions to address legal and ethical concerns. See the [PLOS Data Policy](#) and [FAQ](#) for detailed information.

Yes - all data are fully available without restriction

A Data Availability Statement describing where the data can be found is required at submission. Your answers to this question constitute the Data Availability Statement and **will be published in the article**, if accepted.

**Important:** Stating 'data available on request from the author' is not sufficient. If your data are only available upon request, select 'No' for the first question and explain your exceptional situation in the text box.

Do the authors confirm that all data underlying the findings described in their manuscript are fully available without restriction?

**Describe where the data may be found in full sentences. If you are copying our sample text, replace any instances of XXX with the appropriate details.**

- If the data are **held or will be held in a public repository**, include URLs, accession numbers or DOIs. If this information will only be available after acceptance, indicate this by ticking the box below. For example: *All XXX files are available from the XXX database (accession number(s) XXX, XXX).*
- If the data are all contained **within the manuscript and/or Supporting Information files**, enter the following: *All relevant data are within the manuscript and its Supporting Information files.*
- If neither of these applies but you are able to provide **details of access elsewhere**, with or without limitations, please do so. For example:

All relevant data are within the manuscript and its Supporting Information files.

*Data cannot be shared publicly because of [XXX]. Data are available from the XXX Institutional Data Access / Ethics Committee (contact via XXX) for researchers who meet the criteria for access to confidential data.*

*The data underlying the results presented in the study are available from (include the name of the third party and contact information or URL).*

- This text is appropriate if the data are owned by a third party and authors do not have permission to share the data.

\* typeset

Additional data availability information:

1  
2  
3  
4  
5  
6  
7  
8  
9  
10  
11  
12  
13  
14  
15  
16  
17  
18  
19  
20  
21  
22  
23  
24  
25

Diverse and atypical manifestations of Q fever in a metropolitan city  
hospital: emerging role of next-generation sequencing for laboratory  
diagnosis of *Coxiella burnetii*, a potential biological warfare agent

Short title: Q fever in metropolitan city hospital

Fanfan Xing<sup>1</sup>, Haiyan Ye<sup>1</sup>, Chaowen Deng<sup>1</sup>, Linlin Sun<sup>1</sup>, Yanfei Yuan<sup>1</sup>, Qianyun Lu<sup>1</sup>, Jin  
Yang<sup>1</sup>, Simon K.F. Lo<sup>1</sup>, Ruiping Zhang<sup>2</sup>, Jasper F.W. Chan<sup>3</sup>, Susanna K.P. Lau<sup>3\*</sup>, Patrick C.Y.  
Woo<sup>3\*</sup>

<sup>1</sup>Department of Clinical Microbiology and Infection Control, The University of Hong Kong -  
Shenzhen Hospital, Shenzhen, Guangdong, China

<sup>2</sup>Department of Pathology, The University of Hong Kong - Shenzhen Hospital, Shenzhen,  
Guangdong, China

<sup>3</sup>Department of Microbiology, Li Ka Shing Faculty of Medicine, The University of Hong  
Kong, Hong Kong, China

\*Corresponding authors

E-mail: pcywoo@hku.hk (PCYW); skplau@hku.hk (SKPL)

## 26 **Abstract**

27 Although Q fever has been widely reported in the rural areas of China, there is a paucity of  
28 data on the epidemiology and clinical characteristics of this disease in large metropolitan cities.  
29 In this study, we profile the epidemiology and clinical manifestations of Q fever from a tertiary  
30 hospital in Shenzhen, a Southern Chinese metropolitan city with a large immigrant population  
31 from other parts of China. A total of 14 patients were confirmed to have Q fever during a nine-  
32 year-and-six-month period, five of whom were retrospectively diagnosed during case review  
33 or incidentally picked up because of another research project on unexplained fever without  
34 localizing features. Some patients had the typical occupation and/or exposure history, while a  
35 few other patients have rare manifestations of Q fever, including one with heart failure and  
36 diffuse intracapillary proliferative glomerulonephritis, a patient presenting with a spontaneous  
37 bacterial peritonitis-like syndrome, and another one with concomitant Q fever and brucellosis.  
38 Using a combination of clinical manifestation, inflammatory marker levels, echocardiographic  
39 findings and serological or molecular test results, nine, three and two patients were diagnosed  
40 to have acute, chronic and convalescent Q fever, respectively. Seven, five and two patients  
41 were diagnosed to have Q fever by serological test, nested real-time PCR and next-generation  
42 sequencing respectively. Due to its diverse and atypical manifestations not recognized by  
43 clinicians, the disease was often self-limiting or has responded to empirical doxycycline  
44 prescribed for other purposes, and a lack of laboratory support in some hospitals, the incidence  
45 of Q fever is likely to be underestimated. Next-generation sequencing is becoming an important  
46 diagnostic modality for culture-negative infections, particularly those that the physicians fail  
47 to recognize clinically, such as Q fever.

48

## 49 **Author summary**

50 We describe the epidemiology and clinical manifestations of Q fever from a tertiary hospital  
51 in Shenzhen, a Southern Chinese metropolitan city in China. A total of 14 patients were  
52 confirmed to have Q fever during this study period. Notably, five of them were retrospectively  
53 diagnosed during case review or incidentally picked up because of another research project on  
54 patients with unexplained fever. Interestingly, some patients had rare manifestations of Q fever,  
55 such as heart failure and diffuse intracapillary proliferative glomerulonephritis and  
56 spontaneous bacterial peritonitis. One patient had concomitant Q fever and brucellosis. Half of  
57 the patients were diagnosed by traditional serological test, while the other half by PCR or next-  
58 generation sequencing. Clinicians should have a high index of suspicion of Q fever because of  
59 its diverse and atypical manifestations. The incidence of Q fever is likely to be underestimated.  
60 Next-generation sequencing is becoming increasingly important for diagnosis of culture-  
61 negative infections.

62



## 63 **Introduction**

64 Q fever is a zoonotic infection caused by a pleomorphic intracellular bacterium, *Coxiella*  
65 *burnetii*. Domestic animals, mainly sheep, goats and cattle, are the major source for human  
66 infection [1], with the bacterium present in the faeces, urine, milk and placenta of the infected  
67 animals. In addition, *C. burnetii* can also be found in many ~~other~~ wild and domestic animals  
68 such as horses, dogs, pigs, some birds, etc. [2]. The major route of transmission of *C. burnetii*  
69 to human is through inhalation of contaminated aerosols and dust particles as well as handling  
70 and ingestion of infected meat and milk. Therefore, those who are in close contact with the  
71 animals, such as farmers, abattoir workers and veterinarians are at highest risk. Clinical  
72 presentation of Q fever can be acute or chronic. The acute form of the disease usually presents  
73 as a self-limited non-specific febrile illness or atypical pneumonia, whereas the manifestation  
74 of the chronic form is more variable, although the commonest one is endocarditis. Notably, Q  
75 fever has become a notifiable disease in the United States since 1999 due to its potential as a  
76 biological warfare agent [3]. Traditionally, Q fever is diagnosed in the laboratory using  
77 serological test by detection of antibodies. Recently, molecular tests such as polymerase chain  
78 reaction (PCR) amplification of specific targets have also been employed for more rapid  
79 diagnosis of this condition [4].

80 Although Q fever has been widely reported in the rural areas of China [5], there is a paucity  
81 of data on the epidemiology and clinical characteristics of this disease in large metropolitan  
82 cities. Since it is relatively uncommon in modern cities, diagnosis is often difficult as most  
83 clinicians may be unaware of the diverse manifestations of the disease. Often, the disease may  
84 be treated without noticing the diagnosis through the prescription of empirical doxycycline for  
85 atypical pneumonia or fever without localizing features. In this study, we profile the  
86 epidemiology and clinical manifestations of Q fever from a tertiary hospital in Shenzhen, a  
87 Southern Chinese metropolitan city with a large immigrant population from other parts of

88 China. In addition, the use of next-generation sequencing (NGS), the state-of-the-art and  
89 emerging technology in clinical microbiology, for laboratory diagnosis of Q fever as well as  
90 other culture-negative infectious disease syndromes is also discussed.

91

## 92 **Materials and methods**

### 93 **Ethical statement**

94 Ethics approval for this study (No. [2021]161) was provided by the Institutional Review  
95 Board of The University of Hong Kong - Shenzhen Hospital.

96

### 97 **Patients**

98 This was a retrospective study conducted over a nine-year-and-six-month period (1 July  
99 2012 to 31 December 2021) in The University of Hong Kong - Shenzhen Hospital. This 1,400-  
100 bed multi-specialty hospital was established in 2012 and provides primary to tertiary medical  
101 services to ~~the~~ residents of Shenzhen city in both inpatient and outpatient settings. Shenzhen is  
102 a Special Economic Zone with an estimated population of nearly 18 million people including  
103 a large migrant population from other regions in China. Geographically, it is located in the  
104 Guangdong Province, ~~immediately north~~ to Hong Kong. Affected by the policy of the  
105 government in mainland China, Shenzhen has been one of the fastest growing cities in the  
106 world during the 1990s. ~~The~~ clinical details, laboratory data and radiological findings of all  
107 patients with Q fever were retrieved from the hospital electronic record system and analysed.  
108 The diagnosis of acute, chronic and convalescent Q fever was ~~made~~ based on a combination of  
109 clinical presentation, inflammatory marker levels, echocardiographic findings and serological  
110 or molecular test results. Endocarditis was diagnosed using modified Duke's criteria [6].

111

## 112 **Indirect immunofluorescence assay**

113 Q fever serology was performed in our laboratory since September 2020 using the indirect  
114 immunofluorescent assay (Focus Diagnostics, California, USA) for detection of human IgM  
115 antibodies to *C. burnetii* by a 2-stage “sandwich” principle, in which the wells of the slide was  
116 coated with *C. burnetii* phase I/II antigen and the presence of IgM detected with fluorescein-  
117 labeled antibody to IgM. The test was performed and results interpreted according to  
118 manufacturer’s instructions. A serum titer of  $\geq 1:16$  to both phase I and phase II antigens  
119 strongly suggests recent *C. burnetii* infection, while that of  $< 1:16$  to both phase I and phase II  
120 antigens argues against recent *C. burnetii* infection. During acute infection, the IgM titers to  
121 phase II antigen are greater than those to phase I antigen; whereas during chronic infection or  
122 convalescent phase, the IgM titers to phase I antigen are great than or equal to phase II antigen.  
123 Detection of IgG antibodies was not performed because of budget limitations.

124

## 125 **Nested real-time PCR**

126 Nested real-time PCR for *C. burnetii* was performed in our laboratory since August 2021 by  
127 targeting the transposon-like repetitive region, *IS1111* gene. Total nucleic acid was extracted  
128 from 300  $\mu$ L of plasma using the MagaBio plus Virus DNA/RNA Purification Kit III (BIOER,  
129 Hangzhou, China). The nucleic acid was eluted in 60  $\mu$ L of RNase-free water and was used as  
130 the template for nested real-time PCR. The primers and probe sequences of the nested real-  
131 time PCR assay were synthesized by BGI (Beijing, China) (S1 Table). Real-time PCR was  
132 performed using QuantiNova Probe PCR Kit (Qiagen) in a QuantStudio™ 5 Real-Time PCR  
133 Instrument (ABI, Singapore). The master mix and cycling conditions are shown in S2 and S3  
134 Tables.

135

136 **Next-generation sequencing**

137 Ethylene Diamine Tetraacetic Acid (EDTA)-treated blood was collected from the patients  
138 and sent to the BGI PathoGenesis Pharmaceutical Technology Co., Ltd (Shenzhen, China) for  
139 NGS analysis of pathogenic microorganisms.

140

## 141 **Results**

### 142 **Clinical characteristics**

143 A total of 14 patients were confirmed to have Q fever during the study period (Table 1).  
144 Twelve patients were males and two were females. The median age was 46.5 (range 20-65).  
145 Three had high risk occupations (chef in case 6 and farmers in case 10 and 11). Four (case 2,  
146 6, 10 and 11) had clear histories of recent exposure to goat, sheep or cattle and 4 others (case  
147 3, 8, 9 and 12) have recent visit to the rural environment. The remaining 6 patients (case 1, 4,  
148 5, 7, 13 and 14) denied any recent contact with livestock, although case 1 had recent  
149 unprotected sexual intercourse, which has been reported to be a possible route of *C. burnetii*  
150 transmission [7]. The median interval between disease onset and hospital admission was 10  
151 (range 6-90) days and that between hospital admission and confirmation of the diagnosis of Q  
152 fever was 10.5 (range 3-600) days. All the 14 patients presented with fever and non-specific  
153 symptoms, although case 2 and 3 had very severe headache and were admitted to the neurology  
154 unit as suspected meningitis. Case 6 presented with symptoms of heart failure and  
155 glomerulonephritis (Fig 1) and case 9 presented with a spontaneous bacterial peritonitis-like  
156 syndrome (Fig 2). Four (case 1, 2, 6 and 9) and 9 (case 1, 2, 3, 4, 6, 7, 8, 10 and 14) patients  
157 had hepatomegaly and splenomegaly, respectively. Using a combination of clinical  
158 manifestation, inflammatory marker levels, echocardiographic findings and serological or  
159 molecular test results, 9 (case 1, 2, 3, 4, 5, 7, 8, 11 and 12), 3 (case 6, 9 and 14) and 2 (case 10  
160 and 13) patients were diagnosed to have acute, chronic and convalescent Q fever, respectively.  
161 All the 14 patients survived. For the 10 patients (case 1, 2, 3, 4, 5, 6, 8, 9, 12 and 13) who had  
162 fever on admission, the median time to defervescence was 3.5 (range 1-7) days.

163

164 **Table 1. Demographic and clinical characteristics of patients in the present cohort**

| Patient No. | Year of diagnosis | Sex/Age | Occupation | Exposure history                     | Interval between disease onset to hospital visit (days) | Interval between hospitalization and diagnosis (days) | Form of Q fever | Underlying disease                     | Clinical manifestation                                                                                                                                                                                              | Chest radiographic finding                                     | Abdominal imaging finding                               | Echocardiography                                                                                                                                                   | Days from antibiotic treatment to defervescence |
|-------------|-------------------|---------|------------|--------------------------------------|---------------------------------------------------------|-------------------------------------------------------|-----------------|----------------------------------------|---------------------------------------------------------------------------------------------------------------------------------------------------------------------------------------------------------------------|----------------------------------------------------------------|---------------------------------------------------------|--------------------------------------------------------------------------------------------------------------------------------------------------------------------|-------------------------------------------------|
| 1           | 2014              | M/27    | Docker     | Unprotected sexual exposure          | 11                                                      | 8                                                     | Acute           | None                                   | Fever, chills, weakness, arthralgia, myalgia, relative bradycardia, hepatomegaly, splenomegaly                                                                                                                      | None                                                           | Gallbladder wall thickening, hepatomegaly, splenomegaly | Normal                                                                                                                                                             | 6                                               |
| 2           | 2019              | M/37    | Engineer   | Dog, goat meat, rural environment    | 6                                                       | 3                                                     | Acute           | Hypertension                           | Fever, chills, night sweats, weakness, headache, arthralgia, myalgia, nausea, vomiting, abdominal pain, lower back pain, cough, conjunctival congestion, relative bradycardia, jaundice, hepatomegaly, splenomegaly | None                                                           | Hepatomegaly, splenomegaly, kidney stone                | Normal                                                                                                                                                             | 2                                               |
| 3           | 2019              | M/65    | Headmaster | Guinea pigs, hens, rural environment | 7                                                       | 5                                                     | Acute           | Hypertension, secondary hypothyroidism | Fever, weakness, headache, arthralgia, myalgia, conjunctival congestion, relative bradycardia, splenomegaly                                                                                                         | Bilateral patchy infiltrates and atelectasis                   | Splenomegaly                                            | Sclerosis of aortic valves                                                                                                                                         | 3                                               |
| 4           | 2020              | M/20    | Student    | Unclean food                         | 9                                                       | 600                                                   | Acute           | None                                   | Fever, chills and rigors, splenomegaly                                                                                                                                                                              | Normal                                                         | Splenomegaly                                            | Normal                                                                                                                                                             | 1                                               |
| 5           | 2020              | M/40    | Unemployed | Dogs, rabbits                        | 6                                                       | 570                                                   | Acute           | None                                   | Fever, skin rash, chills, general pain                                                                                                                                                                              | Multiple pulmonary bullae                                      | No abnormality                                          | Normal                                                                                                                                                             | 3                                               |
| 6           | 2020              | M/62    | Chef       | Livestock, rural environment         | 7                                                       | 12                                                    | Chronic         | Hypertension, congestive heart failure | Fever, facial puffiness, lower limb edema, night sweats, weakness, abdominal pain, cough, dyspnea, relative bradycardia, lymphadenopathy, hepatomegaly, splenomegaly                                                | Bilateral patchy infiltrates and pleural effusion              | Splenomegaly, enlarged bilateral kidneys                | Thickening of mitral and tricuspid valves and chordae tendineae; aortic valves stenosis with insufficiency and suspected abscess or hematoma; pericardial effusion | 4                                               |
| 7           | 2020              | M/35    | Clerk      | None                                 | 14                                                      | 510                                                   | Acute           | None                                   | Fever, dizziness                                                                                                                                                                                                    | Inflammation in bilateral lower lung and the left lingual lobe | Cholecystitis, ascites, left kidney stone, splenomegaly | Normal                                                                                                                                                             | Still afebrile when discharged                  |

|    |      |      |                    |                                                                                   |    |     |              |                                       |                                                                             |                                                                                      |                                                                                                            |                                                                    |   |
|----|------|------|--------------------|-----------------------------------------------------------------------------------|----|-----|--------------|---------------------------------------|-----------------------------------------------------------------------------|--------------------------------------------------------------------------------------|------------------------------------------------------------------------------------------------------------|--------------------------------------------------------------------|---|
| 8  | 2021 | M/44 | Clerk              | Lizards, tortoise, fresh water fish, crickets, bovine placenta; rural environment | 6  | 300 | Acute        | None                                  | Fever, headache, nausea and vomiting                                        | Micronodules seen in the left lung, lymph nodes or inflammatory granulomas suspected | Splenomegaly                                                                                               | Normal                                                             | 2 |
| 9  | 2021 | M/35 | Company manager    | Rural environment                                                                 | 10 | 6   | Chronic      | Fatty liver                           | Fever, chills, weakness, abdominal pain, relative bradycardia, hepatomegaly | Bilateral pleural effusion and atelectasis                                           | Gallbladder wall thickening, hepatomegaly, fatty liver, thickened capsule of bilateral kidney, peritonitis | Normal                                                             | 7 |
| 10 | 2021 | F/49 | Farmer             | Goat                                                                              | 20 | 9   | Convalescent | Hypertension                          | Fever <sup>a</sup> , night sweats, arthralgia, myalgia, splenomegaly        | None                                                                                 | Liver cyst, splenomegaly                                                                                   | Enlargement of left atrium                                         | - |
| 11 | 2021 | M/50 | Farmer             | Goat                                                                              | 90 | 30  | Acute        | None                                  | Fever <sup>a</sup> , night sweats, arthralgia, low back pain                | None                                                                                 | Inflammation of terminal ileum                                                                             | Diastolic dysfunction of left ventricle                            | - |
| 12 | 2021 | M/52 | Government servant | Cat, rural environment                                                            | 21 | 8   | Acute        | Hypertension, diabetes mellitus, gout | Fever, weakness, rash, chest pain, lymphadenopathy                          | Bilateral consolidation and pleural effusion                                         | Thickened capsule of bilateral kidneys                                                                     | Regurgitation of mitral and tricuspid valves; pericardial effusion | 4 |
| 13 | 2021 | M/56 | Unemployed         | None                                                                              | 51 | 45  | Convalescent | Chronic obstructive pulmonary disease | Fever, weakness, low back pain, relative bradycardia                        | None                                                                                 | None                                                                                                       | Normal                                                             | 5 |
| 14 | 2021 | F/56 | Retired clerk      | Dog                                                                               | 10 | 4   | Chronic      | Hypertension                          | Fever <sup>a</sup> , chills, headache, splenomegaly                         | None                                                                                 | Cholecystectomy, splenomegaly                                                                              | Vegetation of aortic valves; pericardial effusion                  | - |

165  
166

<sup>a</sup>These patients became afebrile before admission and commencement of antibiotic.

167 **Fig 1. Computed tomography of the thorax and abdomen and histology of renal biopsy**  
168 **for Case 6.**

169 (A) Bilateral diffuse interstitial infiltrates pleural effusion. (B) Bilateral pleural effusion and  
170 mediastinal lymphadenopathy (arrow). (C) Hepatosplenomegaly and ascites. (D)  
171 Symmetrically enlarged kidneys. (E) Diffuse intracapillary hyperplasia in the glomerulus with  
172 neutrophil infiltration in the capillary lumen, and mild proliferation of mesangial cells and  
173 stroma in focal segments of the glomerulus (PAS×400). (F) Focal renal interstitial fibrosis and  
174 edema with neutrophil, lymphocyte and plasmacyte infiltration (H&E×200). (G) Granular C3  
175 deposition in the capillary wall and mesangial regions on immunofluorescent staining (×200).

176 **Fig 2. Computed tomography of the abdomen for Case 9.**

177 (A) Plain film showing peritonitis (arrowhead) and thickened capsule of the left kidney (arrow).  
178 (B) Contrast-enhanced image (arterial phase) showing peritonitis (arrowhead) and thickened  
179 capsule of the right kidney (arrow).

180

181 **Laboratory findings**

182 The laboratory findings of ~~the~~ 14 patients with Q fever in the present cohort are summarized  
183 in Table 2. Three of the 10 patients (case 1, 9 and 12) had increased peripheral white cell count  
184 and neutrophilia. Five patients (case 2, 3, 5, 6 and 10) had moderate thrombocytopenia. Twelve  
185 (case 1, 2, 3, 4, 5, 7, 8, 9, 10, 12, 13 and 14) had mildly to moderately elevated liver  
186 parenchymal enzymes. The median (range) serum alanine transaminase and aspartate  
187 transaminase levels were 103.2 (11.1-154) U/L and 54.9 (25-167.9) U/L respectively. The  
188 median erythrocyte sedimentation rate (ESR) was 28 (range 5-111) mm/hour, with 6 patients  
189 (case 1, 4, 5, 6, 7 and 11) having moderately raised ESR and one patient (case 12) with an ESR  
190 of >100 mm/hour. The median C-reactive protein (CRP) was 87.5 (range 0.45-219.2) mg/L  
191 with 13 patients having elevated CRP. The median activated partial thromboplastin time



192 (aPTT) was 46.1 (range 33.9-82.3) seconds, with 10 patients (case 1, 4, 5, 6, 7, 8, 9, 12, 13 and  
193 14) having prolonged aPTT. Lupus anticoagulant was checked in 9 patients and 6 (case 1, 6, 7,  
194 9, 12, and 14) were detected.

195

196 **Table 2. Laboratory findings of patients in the present cohort**

| Patient No. | WBC (×10 <sup>9</sup> /L) | Neutrophil (×10 <sup>9</sup> /L) | Platelet (×10 <sup>9</sup> /L) | ALT (U/L) | AST (U/L) | Tbil (mmol/L) | ESR (mm/h) | CRP (mg/L) | PT (s) | aPTT (s) | Lupus anticoagulant | Anti-cardiolipin IgM (U/mL) | Anti-cardiolipin IgG (U/mL) | Anti-MPO-IgG (RU/mL) | Anti-PR3-IgG (RU/mL) | RF (U/mL) | Brucella Ab | Diagnostic test for Q fever                  |
|-------------|---------------------------|----------------------------------|--------------------------------|-----------|-----------|---------------|------------|------------|--------|----------|---------------------|-----------------------------|-----------------------------|----------------------|----------------------|-----------|-------------|----------------------------------------------|
| 1           | 10.9                      | 7.9                              | 366                            | 154       | 42        | 15.4          | 57         | 86         | 14.2   | 54       | Detected            | 213                         | 84.4                        | 26.1                 | 46.2                 | 17        | Negative    | CF: phase II 1:640 IFA IgM: phase II 1:800   |
| 2           | 4.6                       | 3                                | 68                             | 107.5     | 100.7     | 53.1          | 17         | 179.5      | 14.4   | 39.4     | Not done            | Not done                    | Not done                    | Not done             | Not done             | Not done  | Negative    | NGS 211 sequences detected                   |
| 3           | 5.5                       | 4.2                              | 114                            | 46.6      | 30.9      | 15.2          | 17         | 54         | 16.7   | 36.1     | Not done            | <2                          | <2                          | 2.05                 | <2                   | Not done  | Negative    | NGS 1021 sequences detected                  |
| 4           | 5.38                      | 4.16                             | 196                            | 110.6     | 51.9      | 14            | 29         | 68.61      | 14     | 45       | Not done            | Not done                    | Not done                    | 5.45                 | 3.01                 | Not done  | Not done    | Nested real-time PCR positive                |
| 5           | 3.75                      | 2.87                             | 103                            | 124.6     | 139       | 10.7          | 40         | 98.57      | 13.7   | 46.3     | Not done            | Not done                    | Not done                    | Not done             | Not done             | 8.6       | Not done    | Nested real-time PCR positive                |
| 6           | 7                         | 4.6                              | 94                             | 11.1      | 25        | 12.7          | 33         | 32         | 13.7   | 49.8     | Detected            | 7.89                        | 3.67                        | <2                   | 4.71                 | 43.9      | Not done    | IFA IgM: phase I > 1:8192, phase II 1:512    |
| 7           | 8.54                      | 5.12                             | 178                            | 86.7      | 56.4      | 26.4          | 51         | 122.91     | 16.8   | 51.9     | Detected            | > 800                       | > 800                       | 76.3                 | > 800                | 21.1      | Negative    | Nested real-time PCR positive                |
| 8           | 6.64                      | 4.91                             | 220                            | 138.4     | 95        | 30.9          | 20         | 89.05      | 14.4   | 45.9     | Not detected        | Negative                    | Negative                    | Not done             | Not done             | Not done  | Negative    | Nested real-time PCR positive                |
| 9           | 19                        | 15.3                             | 290                            | 152.5     | 88        | 16.5          | 22         | 124.9      | 14.9   | 60.9     | Detected            | 88.2                        | >480                        | 10.9                 | 25.8                 | 18.9      | Not done    | IFA IgM: phase I 1:1024, phase II 1:1024     |
| 10          | 3.5                       | 2.3                              | 137                            | 76.7      | 53.4      | 7.4           | 5          | 0.45       | 12.4   | 33.9     | Not detected        | Negative                    | Negative                    | Not done             | Not done             | 48.1      | Negative    | IFA IgM: phase I 1:128, phase II 1:64        |
| 11          | 5.72                      | 4.55                             | 158                            | 33        | 29.5      | 5             | 28         | 12.1       | 13.6   | 36.6     | Not detected        | Negative                    | Negative                    | Not done             | Not done             | 8.8       | Negative    | IFA IgM: phase I negative, phase II 1:64     |
| 12          | 13.1                      | 11.2                             | 281                            | 98.8      | 75.9      | 26.9          | 111        | 219.2      | 15.5   | 82.3     | Detected            | 11.3                        | 99.4                        | 11.8                 | 35.7                 | 12.1      | Negative    | IFA IgM: phase I 1:2048, phase II 1:8192     |
| 13          | 6.5                       | 3.4                              | 410                            | 52.4      | 42.1      | 5.2           | 7          | 40.7       | 12.5   | 41.1     | Not done            | <2                          | <2                          | <2                   | 2.07                 | N/A       | 1:200       | IFA IgM: phase I 1:128; phase II 1:16        |
| 14          | 3.3                       | 2.1                              | 151                            | 144.8     | 167.9     | 5.3           | Not done   | 143.6      | 12.5   | 55.9     | Detected            | 293.2                       | 34.8                        | 4.98                 | 16.6                 | 10.5      | Negative    | IFA IgM: phase I and II not detected, nested |



## 199 **Echocardiography findings and endocarditis**

200 Echocardiography was performed in all of the 14 patients, with 6 of them showing abnormal  
201 findings (Table 1). According to the modified Duke's criteria, 2 patients (case 6 and 14)  
202 fulfilled the criteria for infective endocarditis.

203

## 204 **Microbiological findings and laboratory diagnosis of Q fever**

205 Seven patients (case 1, 6, 9, 10, 11, 12 and 13) were diagnosed to have Q fever by positive  
206 serological test (Table 2). Five patients (case 4, 5, 7, 8 and 14) were diagnosed by positive  
207 nested real-time PCR and two (case 2 and 3) were diagnosed by NGS. Ten patients had brucella  
208 serology performed and ~~was positive in one~~ (case 13).

209

## 210 **Discussion**

211 In this study, we describe the diverse and some atypical manifestations of Q fever in a  
212 densely populated metropolitan city. In the present cohort, some patients had the typical  
213 occupation, exposure history and manifestation. For example, cases 10 and 11 were a couple  
214 and they were farmers with clear contact history with goats. On the other hand, a few other  
215 patients ~~have~~ atypical and rare manifestations of Q fever. Case 9 was a 35-year-old man with  
216 underlying fatty liver who presented with fever, chills and abdominal pain. Although the  
217 clinical diagnosis was spontaneous bacterial peritonitis, chest radiograph revealed bilateral  
218 pleural effusion and atelectasis and contrast computed tomography (CT) of the abdomen  
219 showed abdominal effusion, thickening of parietal peritoneum and bilateral renal capsules (Fig  
220 2). In addition, he had prolonged ~~aPTT~~ at 60.9 seconds and he failed to respond to empirical  
221 intravenous piperacillin-tazobactam for the treatment of spontaneous bacterial peritonitis.  
222 Although trans-esophageal echocardiography did not show any vegetation, Q fever serology

223 was performed and revealed high titers (both  $\geq 1:1024$ ) of IgM to both phase I and phase II  
224 antigens. In the literature, only one other case of Q fever with a spontaneous bacterial  
225 peritonitis-like syndrome was reported [8]. In that 55-year-old man with underlying type 2  
226 diabetes mellitus, he presented with fever and chills for 20 days but there was no abdominal  
227 pain. Only diffuse abdominal fullness without tenderness was observed during physical  
228 examination. Similar to our patient, he also had prolonged aPTT of 74.5 seconds and mildly  
229 deranged liver function test. CT of the abdomen did not show any ascites but gallium scan  
230 revealed hepatomegaly with diffuse uptake in the abdomen, suggestive of peritonitis or  
231 peritoneum carcinomatosis. Q fever serology subsequently showed high titers (both  $\geq 1:2560$ )  
232 of IgG and IgM to phase II antigens. In addition to this case 9 of Q fever presenting as  
233 spontaneous bacterial peritonitis, the manifestation of case 6 was also uncommon. Case 6 was  
234 a 62-year-old man with underlying hypertension and congestive heart failure who presented  
235 with facial puffiness and bilateral lower limb swelling for 5 days without fever. Serum  
236 creatinine was elevated and on increasing trend and there was hypoalbuminemia and  
237 microscopic hematuria. CT of the thorax and abdomen showed interstitial pulmonary edema,  
238 pericardial and bilateral pleural effusion, mediastinal lymphadenopathy, bilateral enlarged  
239 kidneys and ascites (Fig 1A-D). Q fever serology showed that the titers of IgM to phase I and  
240 phase II antigens were 1:8192 and 1:512, respectively. Histological examination of the renal  
241 biopsy revealed diffuse intracapillary proliferative glomerulonephritis (Fig 1E-G), which has  
242 been reported only once as a complication of Q fever [9]. Other reported cases of  
243 glomerulonephritis associated with Q fever were mainly focal and segmental proliferative  
244 glomerulonephritis, mesangioproliferative glomerulonephritis, mesangiocapillary  
245 glomerulonephritis and membranoproliferative glomerulonephritis [9-12]. In our patient, the  
246 glomerulonephritis and renal function responded promptly to doxycycline treatment of the Q  
247 fever.

248 The incidence of Q fever is underestimated. Failure to make a diagnosis of Q fever is mainly  
249 due to the difficulty for the clinician to recognize the disease or lack of laboratory support to  
250 confirm the diagnosis. In modern cities where farms are not commonly found and the incidence  
251 of Q fever low, doctors are unfamiliar with the diverse presentations of this infection.  
252 Moreover, the disease is often self-limited or if presented as atypical pneumonia, it may be  
253 treated empirically with doxycycline without confirming the microbiological diagnosis through  
254 ordering the appropriate laboratory tests. As illustrated in the present cohort, case 13 was a 56-  
255 year-old man presented with fever and back pain. As *Brucella melitensis* was isolated from the  
256 patient's blood culture and brucella serology was also positive, the patient was treated with  
257 doxycycline and gentamicin for one week followed by doxycycline for five more weeks. The  
258 patient responded and was discharged uneventfully. It was only during case review one and a  
259 half months later that the diagnosis of Q fever was also suspected. The serum of the patient  
260 was retrieved and Q fever serology showed that the titers of IgM to phase I and phase II antigens  
261 were 1:128 and 1:16 respectively. In fact, co-infection of *C. burnetii* and *Brucella* species has  
262 only been reported once in the literature [13]. In that case, the patient was a 30-year-old  
263 agricultural worker who presented with fever and non-specific symptoms. He worked in a  
264 sheep farm and has consumed unpasteurized dairy products of sheep origin in Bosnia and  
265 Herzegovina. Similar to our case 13, blood culture was positive for *B. melitensis* and brucella  
266 serology was also positive. In addition, *C. burnetii* phase II IgM/IgG titers were 1:50 and  
267 1:1024, respectively, confirming the co-infection. As the animal source of these two bacteria  
268 are common, we speculate that *C. burnetii* and *Brucella* co-infection is also under reported, as  
269 patients who are treated with brucellosis would have their Q fever treated automatically. In  
270 addition to case 13, it is of note that four other patients (case 4, 5, 7 and 8) were clinically  
271 diagnosed to have typhus-like illness during their admissions, although none of them was  
272 laboratory confirmed. Hence, doxycycline was empirically prescribed and they responded

273 promptly. Their diagnosis of Q fever was only incidentally confirmed by real-time quantitative  
274 PCR when they were investigated retrospectively for unexplained fever without localizing  
275 features in another research project. As for the lack for laboratory support, some microbiology  
276 laboratories are not equipped with tests for Q fever. For example, for the laboratory in our  
277 hospital, serology test was only available since late 2020. This is indeed the reason why 70%  
278 of the Q fever cases in the present cohort were made since this time. For case 1 which the  
279 diagnosis was made in 2014, the laboratory test was actually carried out in Hong Kong when  
280 the diagnosis of Q fever was suspected despite there was no obvious exposure histories to  
281 animals.

282 NGS is becoming an important diagnostic modality for culture-negative infections,  
283 particularly those that the physicians fail to recognize clinically. When NGS technologies first  
284 appeared in the market, they were mainly used for genome sequencing. With the advancement  
285 of sequencing chemistries and computational capacity, NGS technologies have matured into  
286 clinical applications in the recent years [14]. In the clinical setting for infectious diseases, NGS  
287 is used most often for patients who have fever without localizing features or culture-negative  
288 infections. We have recently reported its application in fungal diagnosis as well as confirming  
289 the first case of listeria meningitis in a patient with autoantibody against interferon gamma and  
290 another one with *Mycobacterium marinum* infection [15-17]. In the present cohort, case 2 and  
291 3 both presented with fever and severe headache and were admitted to the neurology unit as  
292 suspected meningitis. Lumbar puncture was performed but analysis of the cerebrospinal fluid  
293 was negative. At that time, Q fever serology and real-time PCR test were not yet available in  
294 our hospital. Hence, blood samples of the patients were sent for NGS, which revealed 211 and  
295 1021 sequence reads of *C. burnetii* respectively, confirming the diagnosis of Q fever. In our  
296 setting, the NGS was performed in a private laboratory with the cost of RMB 4,500 (~698  
297 USD) per sample and the turn-around-time for these two cases were two days, making the use

298 of this robust technology pragmatic and affordable in ~~the~~ clinical setting. It is of note that Q  
299 fever has been diagnosed a few times using NGS in the literature [18-20], including a recent  
300 outbreak in southern China [19]. In that outbreak, plasma samples from 138 out of 2382  
301 patients who had fever of unknown source were tested positive for *C. burnetii* sequences by  
302 NGS and the outbreak was finally traced to goats and cattle in a slaughterhouse [19]. With its  
303 low equipment cost, short turn-around-time and portable size, the recent invention of the  
304 Oxford Nanopore Technologies' MinION device and further improvement of its sequencing  
305 accuracy will make the use of NGS within clinical microbiology laboratories feasible in the  
306 near future.

307

## 308 **Acknowledgments**

309 We are grateful to the staff at the Department of Clinical Microbiology and Infection  
310 Control, the Department of Pathology, the Department of Medical Imaging, The University of  
311 Hong Kong-Shenzhen Hospital, and the Department of Microbiology, The University of Hong  
312 Kong for facilitation of the study.

313

## 314 **References**

- 315 1. Guatteo R, Seegers H, Taurel AF, Joly A, Beaudeau F. Prevalence of *Coxiella burnetii*  
316 infection in domestic ruminants: a critical review. *Vet Microbiol.* 2011 Apr 21;149(1-2):1-  
317 16. doi: 10.1016/j.vetmic.2010.10.007.
- 318 2. Cutler SJ, Bouzid M, Cutler RR. Q fever. *J Infect.* 2007 Apr;54(4):313-8. doi:  
319 10.1016/j.jinf.2006.10.048.
- 320 3. Select Agents and Toxins List. HHS and USDA select agents and toxins [cited 12 Nov  
321 2021]. In: Federal Select Agent Program [Internet]. Federal Select Agent Program 2021.  
322 Available from: <https://www.selectagents.gov/sat/list.htm>.



- 323 4. Fenollar F, Fournier PE, Raoult D. Molecular detection of *Coxiella burnetii* in the sera of  
324 patients with Q fever endocarditis or vascular infection. *J Clin Microbiol.* 2004  
325 Nov;42(11):4919-24. doi: 10.1128/JCM.42.11.4919-4924.2004.
- 326 5. El-Mahallawy HS, Lu G, Kelly P, Xu D, Li Y, Fan W, et al. Q fever in China: a systematic  
327 review, 1989-2013. *Epidemiol Infect.* 2015 Mar;143(4):673-81. doi:  
328 10.1017/S0950268814002593.
- 329 6. Fournier PE, Casalta JP, Habib G, Messana T, Raoult D. Modification of the diagnostic  
330 criteria proposed by the Duke Endocarditis Service to permit improved diagnosis of Q  
331 fever endocarditis. *Am J Med.* 1996 Jun;100(6):629-33. doi: 10.1016/s0002-  
332 9343(96)00040-x.
- 333 7. Milazzo A, Hall R, Storm PA, Harris RJ, Winslow W, Marmion BP. Sexually transmitted  
334 Q fever. *Clin Infect Dis.* 2001 Aug 1;33(3):399-402. doi: 10.1086/321878.
- 335 8. Chang K, Ko WC, Li BF, Liu PY, Chiu NT. Diffuse abdominal uptake mimicking  
336 peritonitis in gallium inflammatory scan: an unusual feature of acute Q fever. *Kaohsiung*  
337 *J Med Sci.* 2005 Nov;21(11):522-6. doi: 10.1016/S1607-551X(09)70161-5.
- 338 9. Perez-Fontan M, Huarte E, Tellez A, Rodriguez-Carmona A, Picazo ML, Martinez-Ara J.  
339 Glomerular nephropathy associated with chronic Q fever. *Am J Kidney Dis.* 1988  
340 Apr;11(4):298-306. doi: 10.1016/s0272-6386(88)80134-3.
- 341 10. Tolosa-Vilella C, Rodríguez-Jornet A, Font-Rocabanyera J, Andreu-Navarro X.  
342 Mesangioproliferative glomerulonephritis and antibodies to phospholipids in a patient with  
343 acute Q fever: case report. *Clin Infect Dis.* 1995 Jul;21(1):196-8. doi:  
344 10.1093/clinids/21.1.196.
- 345 11. Uff JS, Evans DJ. Mesangio-capillary glomerulonephritis associated with Q-fever  
346 endocarditis. *Histopathology.* 1977 Nov;1(6):463-72. doi: 10.1111/j.1365-  
347 2559.1977.tb01685.x.

- 348 12. Leclerc S, Royal V, Dufresne SF, Mondésert B, Laurin LP. Membranoproliferative  
349 Glomerulonephritis in a Patient With Chronic Q Fever. *Kidney Int Rep.* 2020 Oct  
350 8;5(12):2393-2398. doi: 10.1016/j.ekir.2020.09.038.
- 351 13. Peric L, Sabadi D, Rubil I, Bogdan M, Guzvinec M, Dakovic Rode O, et al. Imported  
352 brucellosis and Q-fever coinfection in Croatia: a case report. *J Infect Dev Ctries.* 2018 Jun  
353 30;12(6):499-503. doi: 10.3855/jidc.10151.
- 354 14. Wilson MR, Naccache SN, Samayoa E, Biagtan M, Bashir H, Yu G, Salamat SM, et al.  
355 Actionable diagnosis of neuroleptospirosis by next-generation sequencing. *N Engl J Med.*  
356 2014 Jun 19;370(25):2408-17. doi: 10.1056/NEJMoa1401268. Epub 2014 Jun 4.
- 357 15. Tsang CC, Teng JLL, Lau SKP, Woo PCY. Rapid Genomic Diagnosis of Fungal Infections  
358 in the Age of Next-Generation Sequencing. *J Fungi (Basel).* 2021 Aug 5;7(8):636. doi:  
359 10.3390/jof7080636. PMID: 34436175.
- 360 16. Xing F, Hung DL, Lo SKF, Chen S, Lau SKP, Woo PCY. Next-generation sequencing-  
361 based diagnosis of bacteremic *Listeria monocytogenes* meningitis in a patient with anti-  
362 interferon gamma autoantibodies: a case report. *Infect Microb Dis.* Forthcoming.
- 363 17. Xing F, Lo SKF, Ma Y, Ip JD, Chan WM, Zhou M, et al. Rapid diagnosis of *Mycobacterium*  
364 *marinum* infection by next-generation sequencing: a case report. *Front Med (Lausanne).*  
365 Forthcoming.
- 366 18. Kondo M, Dalai SC, Venkatasubrahmanyam S, Eisenberg N, Robinson BD, Westblade LF,  
367 et al. Diagnosis and Genotyping of *Coxiella burnetii* Endocarditis in a Patient with  
368 Prosthetic Pulmonary Valve Replacement Using Next-Generation Sequencing of Plasma  
369 Microbial Cell-Free DNA. *Open Forum Infect Dis.* 2019 Jun 1;6(6):ofz242. doi:  
370 10.1093/ofid/ofz242.
- 371 19. Huang M, Ma J, Jiao J, Li C, Chen L, Zhu Z, et al. The epidemic of Q fever in 2018 to  
372 2019 in Zhuhai city of China determined by metagenomic next-generation sequencing.

373 PLoS Negl Trop Dis. 2021 Jul 15;15(7):e0009520. doi: 10.1371/journal.pntd.0009520.

374 20. Huang J, Wang R, Gao C, Lü Y, Cao Z, Deng S, et al. A case of tick-transmitted Q fever in  
375 Lishui, China diagnosed by next-generation sequencing. J Int Med Res. 2021  
376 Sep;49(9):3000605211025398. doi: 10.1177/03000605211025398.

377

378

379 **Supporting information**

380 **S1 Table. Primers and probe for *Coxiella burnetii* IS1111 gene nested real-time PCR**

381

382 **S2 Table. Master mix for *Coxiella burnetii* IS1111 gene nested real-time PCR**

383

384 **S3 Table. Cycling profile of *Coxiella burnetii* IS1111 gene nested real-time PCR**

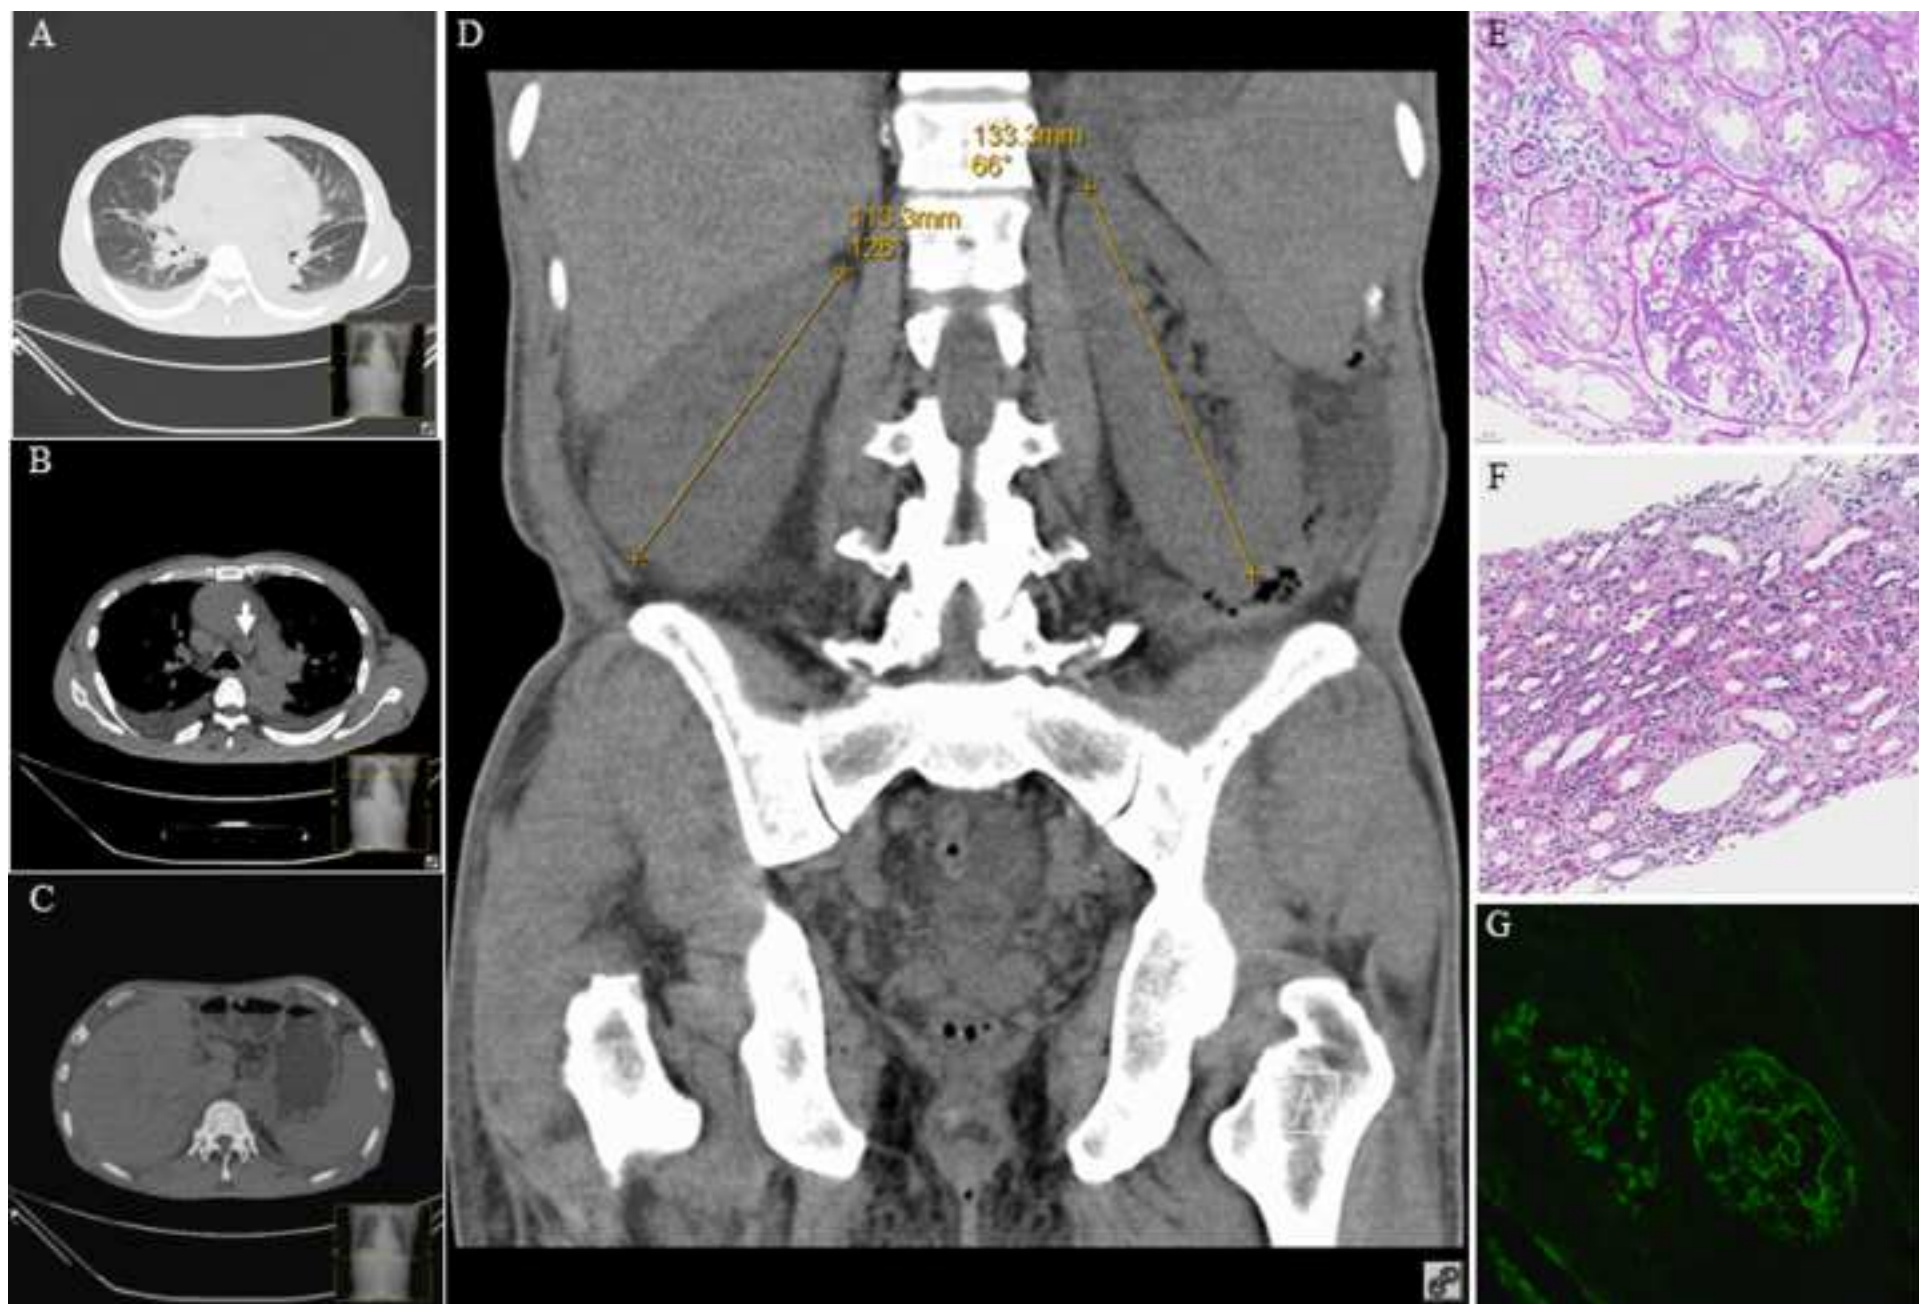

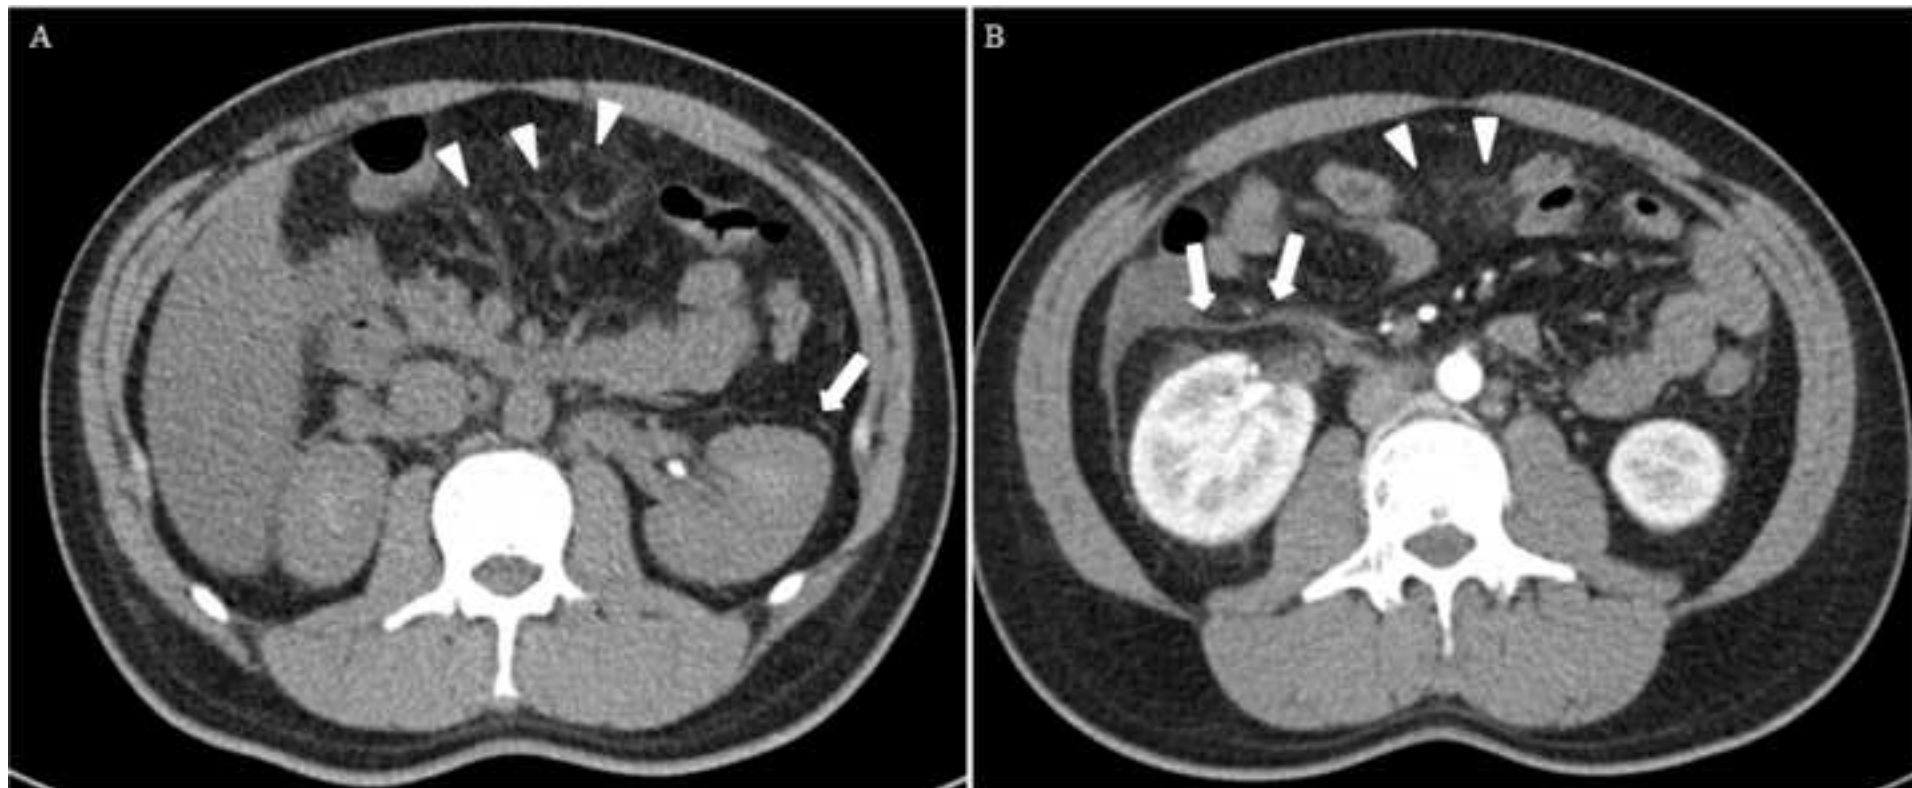

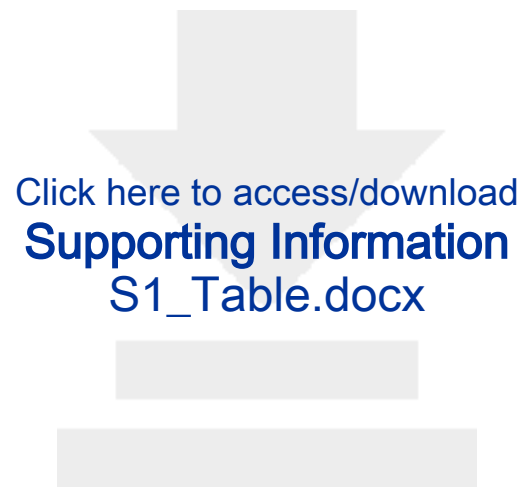

Click here to access/download  
**Supporting Information**  
S1\_Table.docx

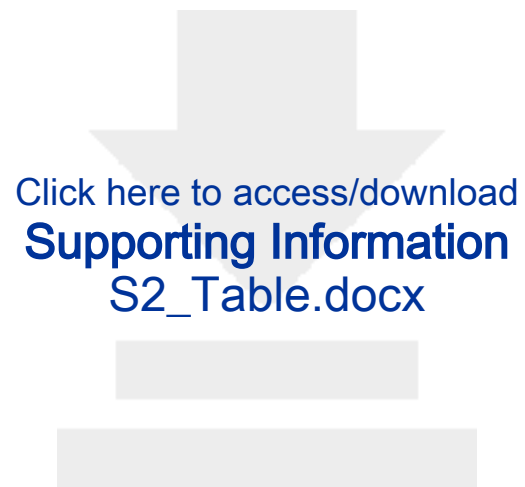

Click here to access/download  
**Supporting Information**  
S2\_Table.docx



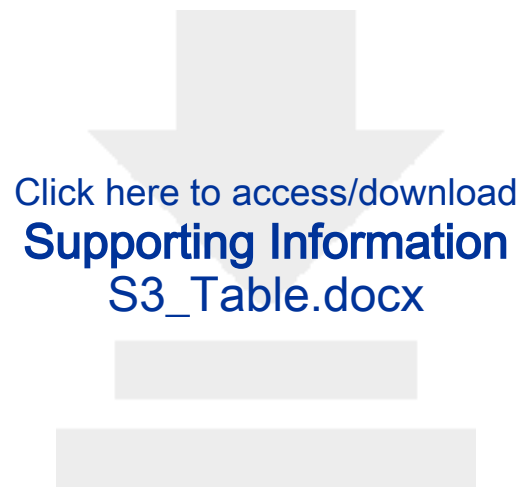

Click here to access/download  
**Supporting Information**  
S3\_Table.docx
